# Supplementary material
Source: HighWire-hosted journal article supplement (https://bmjopen.bmj.com/content/7/11/e018628)
Supplement: inline-supplementary-material-1 [file inline-supplementary-material-1.pdf]

Supplementary Table 1. Augmented Dickey-Fuller test results examining the stationarity of ED visit time series.

| Type        | Lags | Rho      | Pr < Rho | Tau          | Pr < Tau          |
|-------------|------|----------|----------|--------------|-------------------|
| Zero Mean   | 0    | -0.4810  | 0.5719   | -0.59        | 0.4582            |
|             | 1    | -0.1790  | 0.6400   | -0.27        | 0.5850            |
|             | 2    | -0.0538  | 0.6682   | -0.11        | 0.6433            |
| Single Mean | 0    | -56.5620 | 0.0008   | <b>-6.59</b> | <b>&lt;0.0001</b> |
|             | 1    | -78.9803 | 0.0008   | <b>-6.20</b> | <b>&lt;0.0001</b> |
|             | 2    | -92.3834 | 0.0008   | <b>-5.32</b> | <b>&lt;0.0001</b> |
| Trend       | 0    | -56.6943 | 0.0003   | <b>-6.57</b> | <b>&lt;0.0001</b> |
|             | 1    | -79.0608 | 0.0003   | <b>-6.16</b> | <b>&lt;0.0001</b> |
|             | 2    | -92.4282 | 0.0002   | <b>-5.28</b> | <b>0.0002</b>     |

Supplementary Table 2. Autocorrelation check for white noise.

| To lag | Chi-Square | DF | Pr > ChiSq | Autocorrelations |        |        |        |        |        |
|--------|------------|----|------------|------------------|--------|--------|--------|--------|--------|
| 6      | 12.27      | 6  | 0.0562     | 0.318            | -0.055 | -0.128 | -0.056 | -0.076 | -0.099 |
| 12     | 19.09      | 12 | 0.0863     | -0.073           | 0.018  | 0.064  | -0.036 | 0.178  | 0.162  |

Supplementary Table 3. Identification and filtration of the tentative ARIMA models using the algorithms of MINIC.

| Lags | MA 0     | MA 1            | MA 2     | MA 3     | MA 4     | MA 5     |
|------|----------|-----------------|----------|----------|----------|----------|
| AR 0 | 14.48395 | <b>12.41575</b> | 12.45405 | 12.4474  | 12.47975 | 12.52964 |
| AR 1 | 12.42663 | 12.46816        | 12.48236 | 12.48696 | 12.52789 | 12.57798 |
| AR 2 | 12.42375 | 14.46147        | 12.51414 | 12.5389  | 12.57859 | 12.62943 |
| AR 3 | 12.43796 | 12.48627        | 12.53893 | 12.59085 | 12.6313  | 12.68512 |
| AR 4 | 12.47641 | 12.52613        | 12.57858 | 12.63122 | 12.68382 | 12.73433 |
| AR 5 | 12.52609 | 12.57634        | 12.62908 | 12.68016 | 12.72565 | 12.68147 |

Supplementary Table 4. Identification and filtration of the tentative ARIMA models using the algorithms of SCAN.

| Lags | MA 0   | MA 1   | MA 2   | MA 3   | MA 4   | MA 5   |
|------|--------|--------|--------|--------|--------|--------|
| AR 0 | 0.0023 | 0.6443 | 0.2748 | 0.6353 | 0.5256 | 0.3936 |
| AR 1 | 0.0749 | 0.2860 | 0.3377 | 0.6141 | 0.9316 | 0.7217 |
| AR 2 | 0.5546 | 0.9361 | 0.4684 | 0.7489 | 0.8320 | 0.9746 |
| AR 3 | 0.9618 | 0.7104 | 0.6811 | 0.8549 | 0.9011 | 0.7460 |
| AR 4 | 0.3620 | 0.6899 | 0.7378 | 0.7576 | 0.6705 | 0.9213 |
| AR 5 | 0.4166 | 0.9133 | 0.7916 | 0.7893 | 0.6999 | 0.7524 |

Note: what you were looking for was a rectangular of p-values, all of which were nonsignificant. The yellow rectangular was one of two examples; the top of the rectangular was suggested process (AR 0, MA 1)

Supplementary Table 5. Identification and filtration of the tentative ARIMA models using the algorithms of ESACF.

| Lags | MA 0    | MA 1   | MA 2   | MA 3   | MA 4   | MA 5   |
|------|---------|--------|--------|--------|--------|--------|
| AR 0 | 0.0035  | 0.6473 | 0.2863 | 0.6440 | 0.5328 | 0.4165 |
| AR 1 | <0.0001 | 0.1281 | 0.3530 | 0.6537 | 0.9538 | 0.7486 |
| AR 2 | 0.0070  | 0.7835 | 0.1107 | 0.6708 | 0.9421 | 0.9891 |
| AR 3 | 0.4669  | 0.8635 | 0.1565 | 0.3464 | 0.7319 | 0.8681 |
| AR 4 | 0.6883  | 0.0006 | 0.1771 | 0.7553 | 0.4519 | 0.9510 |
| AR 5 | <0.0001 | 0.2663 | 0.2103 | 0.2278 | 0.2409 | 0.9398 |

Note: the yellow triangle showed that AR 0, MA 1 was a possibility (the triangle can go either down or to the right). However, the other four models were also recommended.

Supplementary Table 6. The characteristics of six candidate ARIMA models.

| Models          | AIC      | SBC      | All parameters for p values    |
|-----------------|----------|----------|--------------------------------|
| ARIMA (0, 0, 1) | 1290.563 | 1295.425 | All $p < 0.05$                 |
| ARIMA (1, 0, 0) | 1292.483 | 1297.344 | All $p < 0.05$                 |
| ARIMA (1, 0, 1) | 1292.528 | 1299.82  | All $p < 0.05$                 |
| ARIMA (2, 0, 1) | 1292.497 | 1299.79  | $P > 0.05$ for AR1, 1 at lag=2 |
| ARIMA (3, 0, 1) | 1291.044 | 1298.337 | $P > 0.05$ for AR1, 1 at lag=3 |
| ARIMA (5, 0, 1) | 1292.287 | 1299.579 | $P > 0.05$ for AR1, 1 at lag=5 |

Supplementary Figure 1. Weekly proportion of ED visits with influenza-like illness from 1st week, 2011 to 52th week, 2016. It showed that epidemics clearly influence the quantity of ED visits.

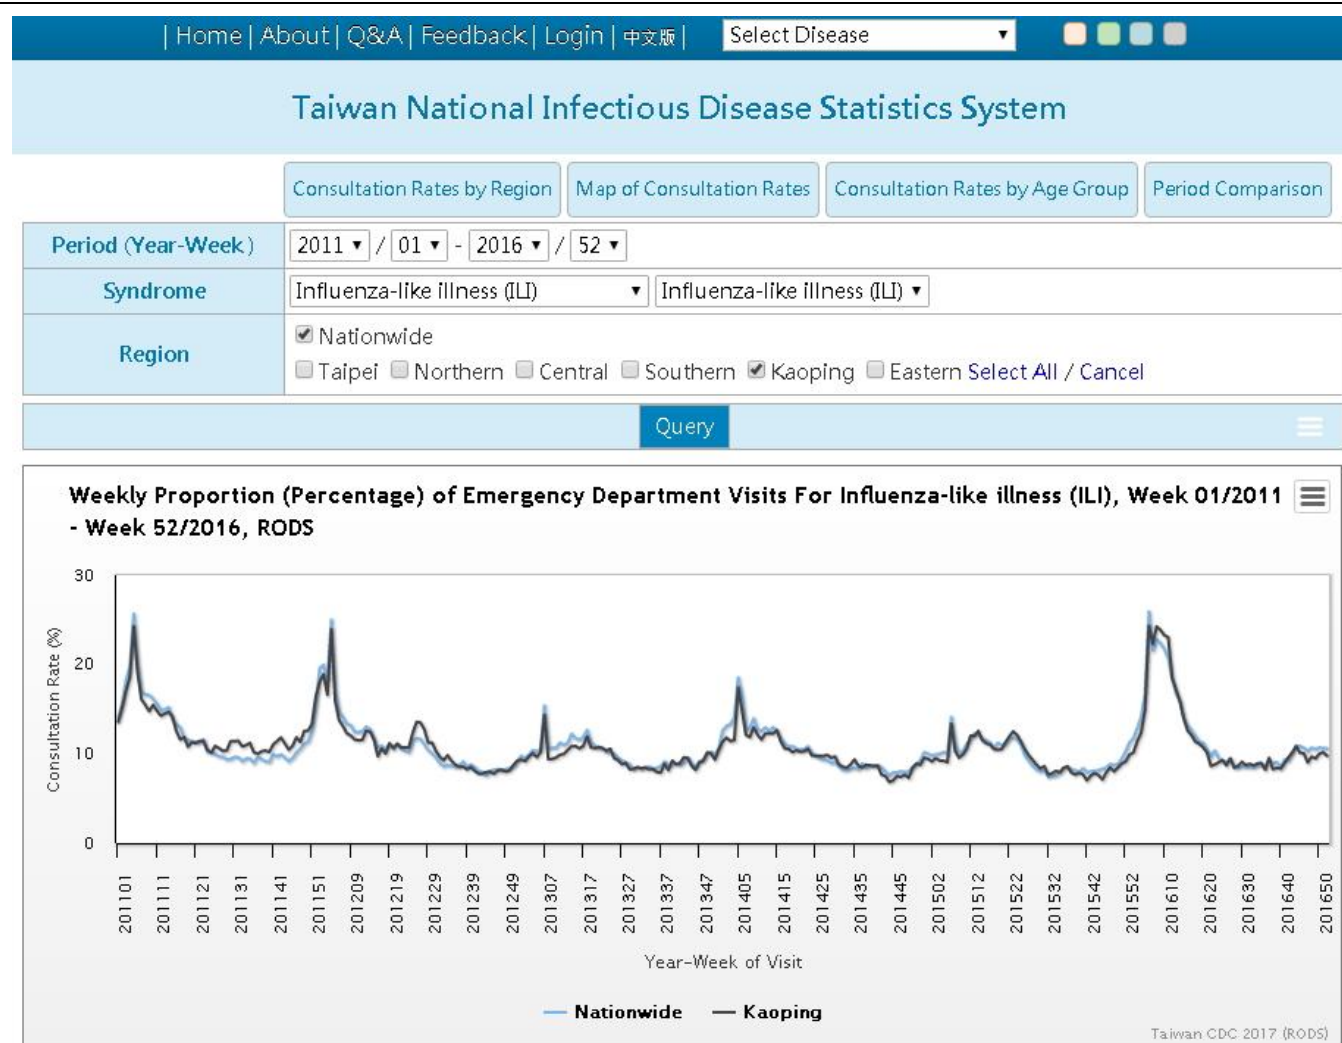

#### Note

1. Data as of 08:18:16, 2017/05/16.
2. Latest available data: Week 19, 2017.
3. Current week: Week 20, 2017.
4. The results of queries are generated automatically. Data may be subject to change without prior notice.
5. The regional distribution is calculated based on the location of the visiting hospital.

Data resource:

[https://nidss.cdc.gov.tw/en/RODS\\_2.aspx?dc=rods&disease=1](https://nidss.cdc.gov.tw/en/RODS_2.aspx?dc=rods&disease=1)
